# Supplementary material
Source: PubMed Central journal article supplement (PMC3511995)
Supplement: mmc1.pdf [file mmc1.pdf]

## Supplemental Data

### Divergent Whole-Genome Methylation Maps of Human and Chimpanzee Brains Reveal

### Epigenetic Basis of Human Regulatory Evolution

Jia Zeng, Genevieve Konopka, Brendan G. Hunt, Todd M. Preuss, Dan Geschwind, and Soojin V. Yi

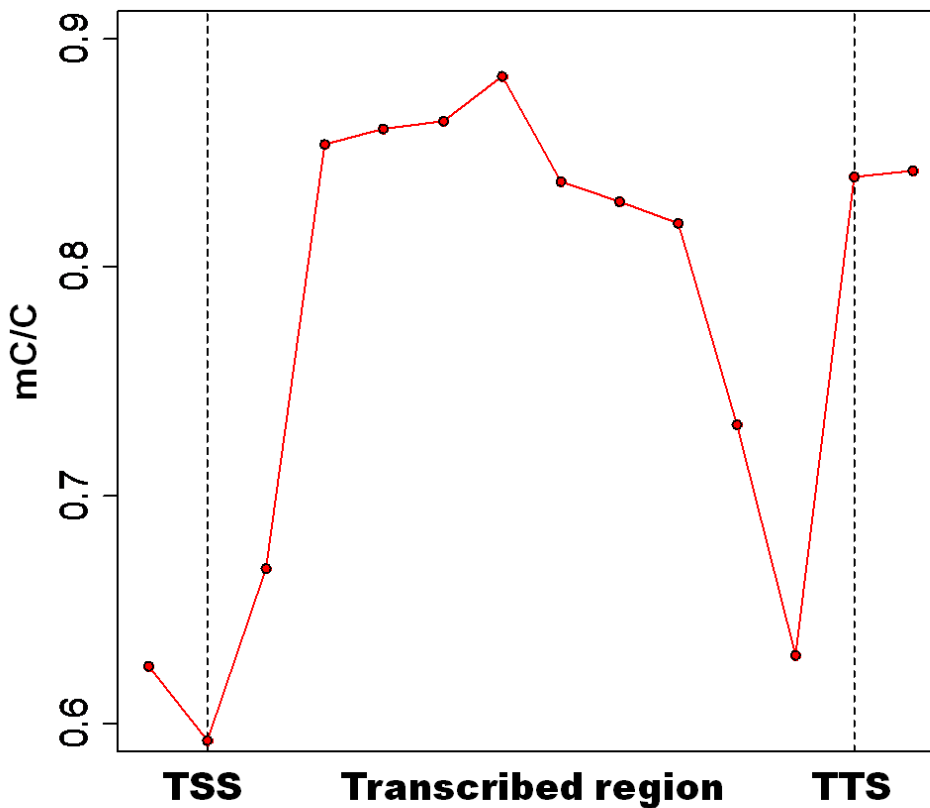

**Figure S1. Variation of Methylation Levels in Human Transcription Units**

CG methylation profiles along the transcribed region plus 2kb upstream the transcription start site (TSS) and 2kb downstream the transcription end site (TTS). Each point indicates the mean CG methylation level for each equal size bin in the transcribed region or the 1kb interval in the untranslated region.

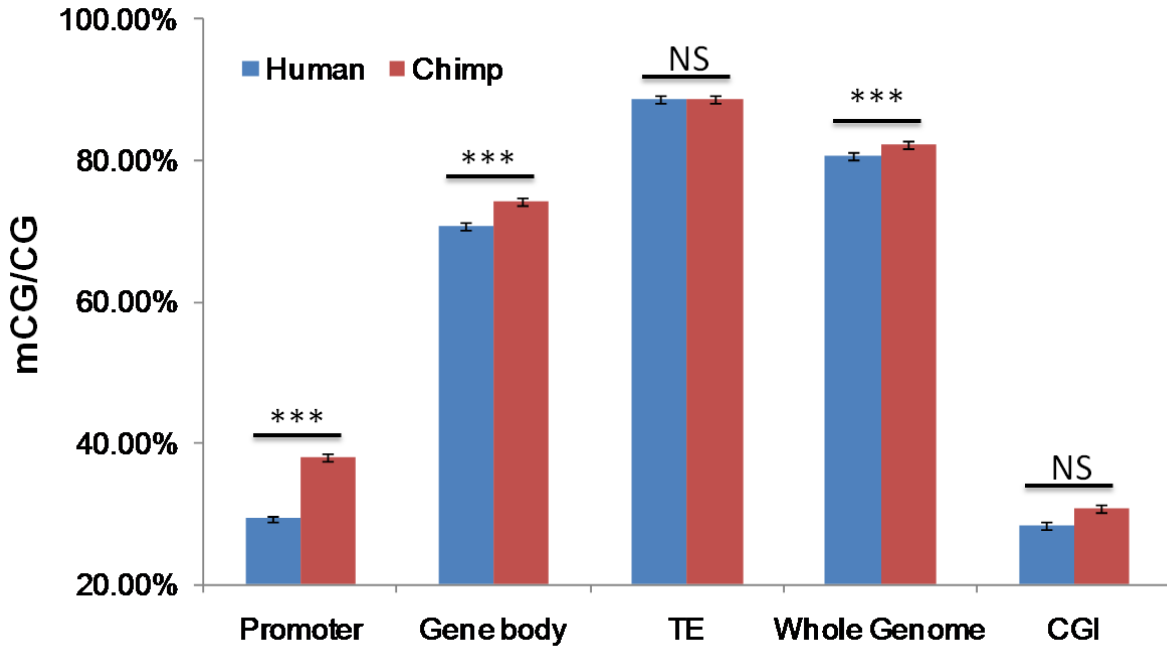

**Figure S2. Differences in Fractional Methylation Levels between Human and Chimpanzee Brains**

The mean fractional methylation levels ( $\pm$  S.E.) of different genomic regions. \*\*\*  $P < 10^{-15}$ , NS: Not Significant, Wilcoxon test. Promoters are the most differentially methylated; human promoters on average exhibit 23% lower methylation relative to chimpanzee promoters (mean mCG/CG levels are 0.293 and 0.381 for human and chimpanzee promoters, respectively. The difference is  $(0.381 - 0.293) / 0.381 = 23\%$ ). Interestingly, TEs still exhibit similar, high levels of DNA methylation, which is in line with a strong silencing effect.

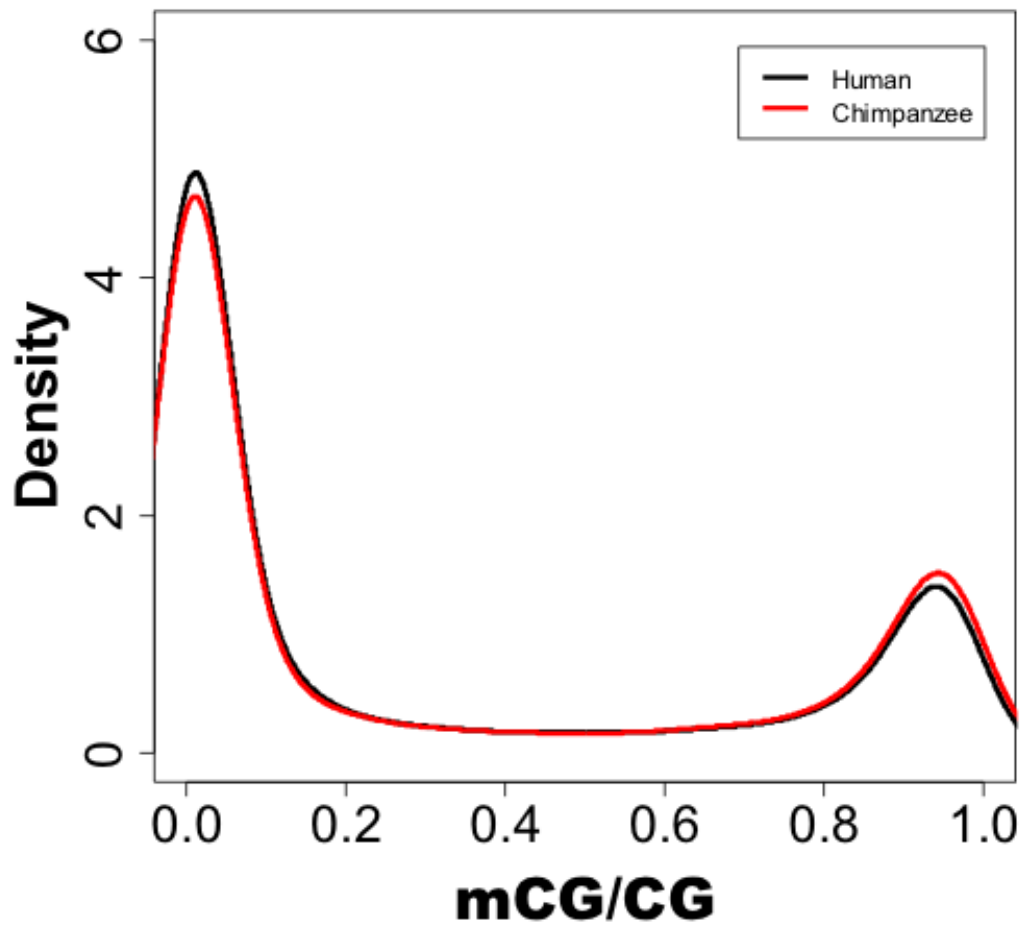

**Figure S3. Density Distributions of Human and Chimpanzee CpG Island Fractional Methylation Levels**

CpG islands exhibit no evidence of differential methylation between human and chimpanzee genomes (Wilcoxon test,  $P = 0.2327$ ).

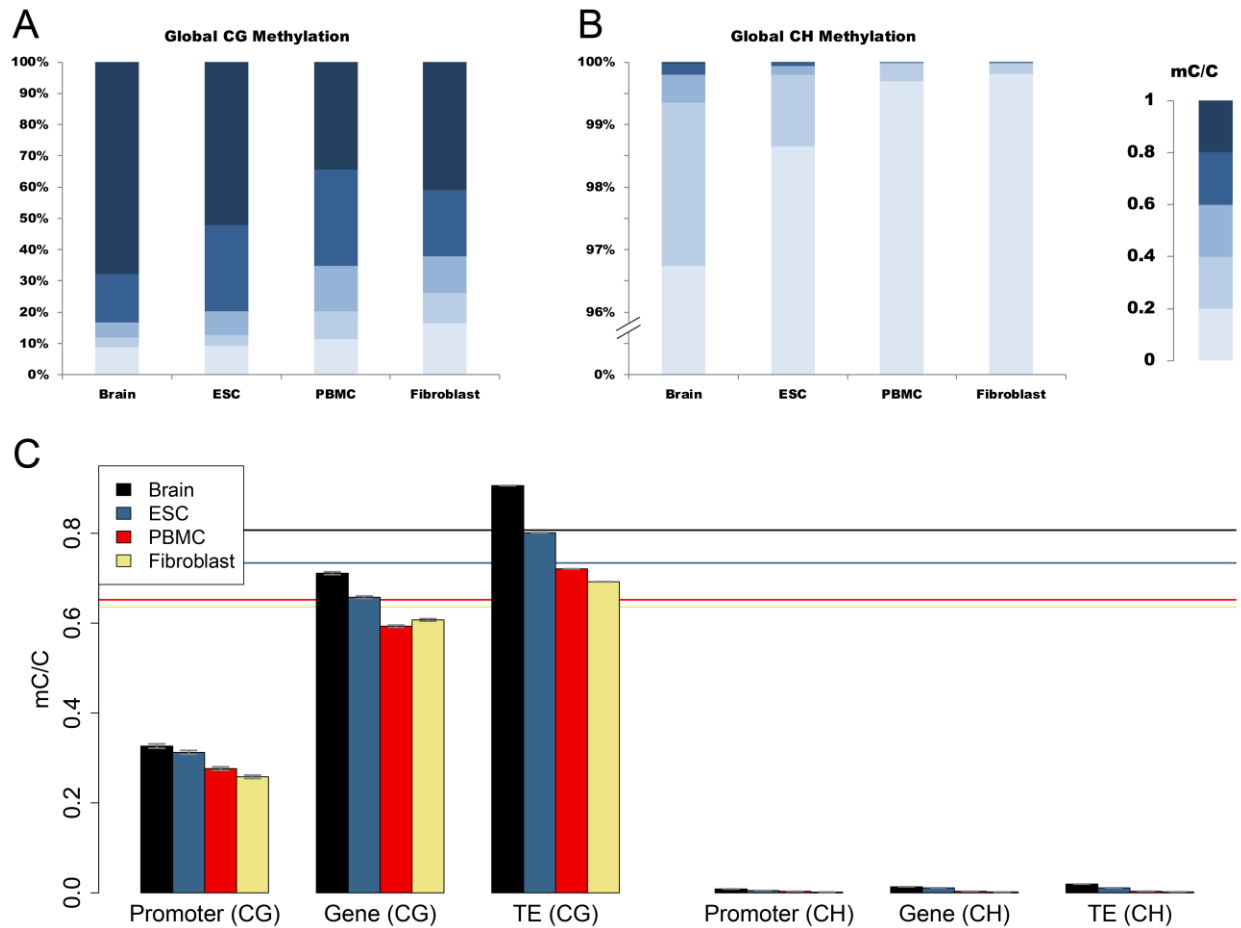

**Figure S4. Differences in DNA Methylation Levels among Human Tissues and Genomic Features, after Removing Duplicate Reads from Brain Sample**

(A) Proportional representation of genome-wide DNA methylation levels for individual CG dinucleotides in human prefrontal cortex (brain), embryonic stem cells (ESC), neonatal fibroblasts (fibroblast), and peripheral blood mononuclear cells (PBMC).

(B) Same analyses as in (A), but for CH dinucleotide context (H = A, T, or C).

(C) Mean methylation levels in each tissue for gene promoters (CG context N = 18,368, CH context N = 18,566), gene bodies (CG context N = 18,454, CH context N = 18,640), and transposable elements (CG context N = 1,763,067, CH context N = 2,919,957). Horizontal lines indicate global means of methylation levels for individual CG sites. Error bars, 95% confidence intervals of the mean.

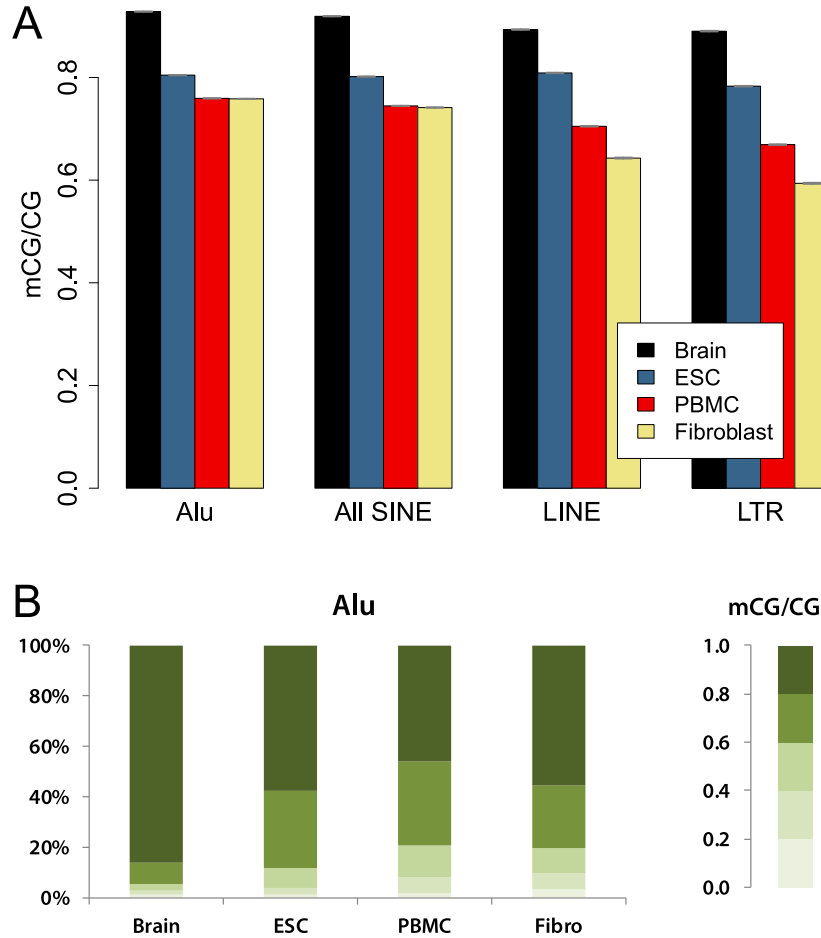

**Figure S5. Differences in DNA Methylation Levels for Transposable Element Classes among Human Tissues**

(A) Mean CG methylation levels in human prefrontal cortex (brain), embryonic stem cells (ESC), neonatal fibroblasts (fibroblast), and peripheral blood mononuclear cells (PBMC) for the following classes of transposable elements as identified by RepeatMasker: Alu elements (N = 881,311), all short interspersed elements including Alu (All SINE; N = 1,043,521), long interspersed elements (LINE; N = 370,983), and long terminal repeats (LTR; N = 291,925).

(B) Proportional representation of mean CG methylation levels for each Alu element.

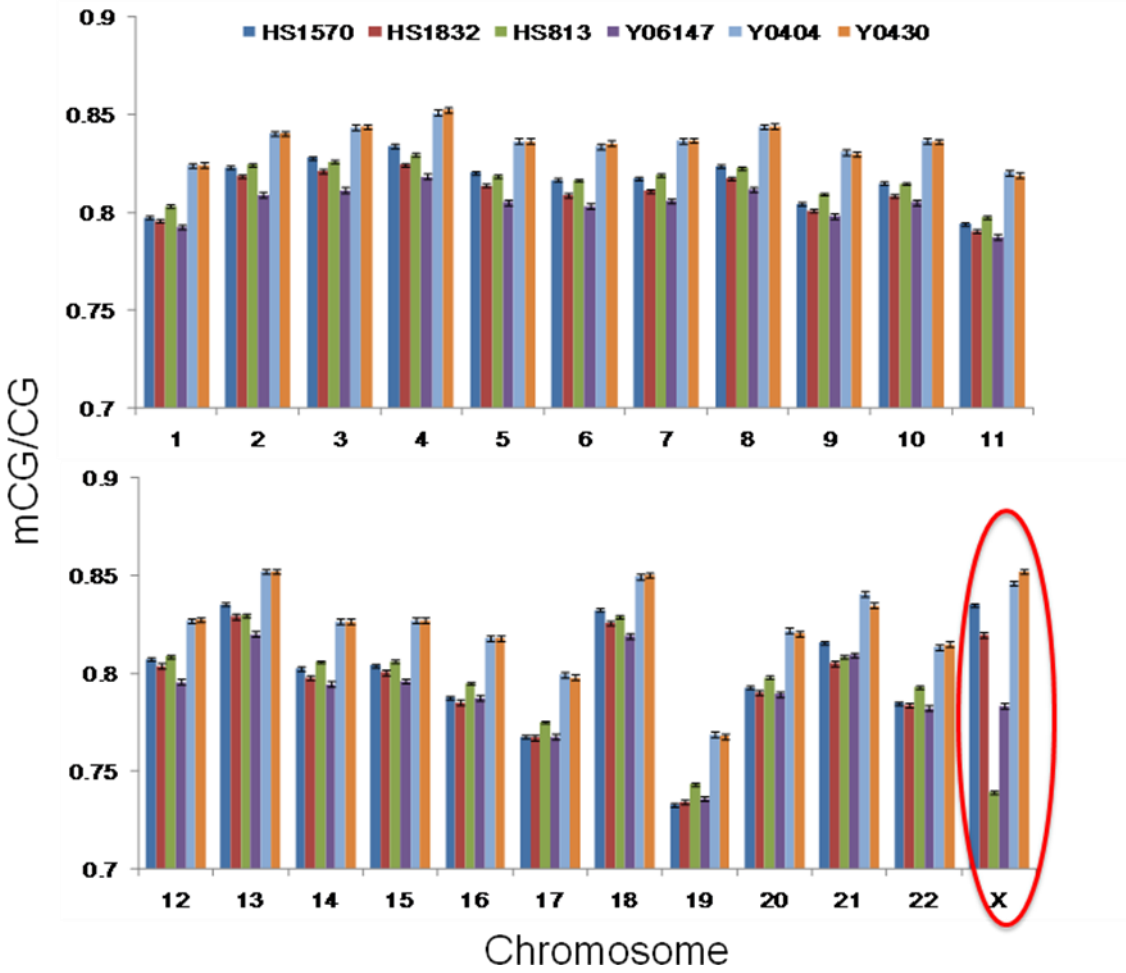

**Figure S6. Chromosome-wide Variation of DNA Methylation in Human and Chimpanzee Individuals**

The X chromosome is notably hypomethylated in the female sample (Hs813).

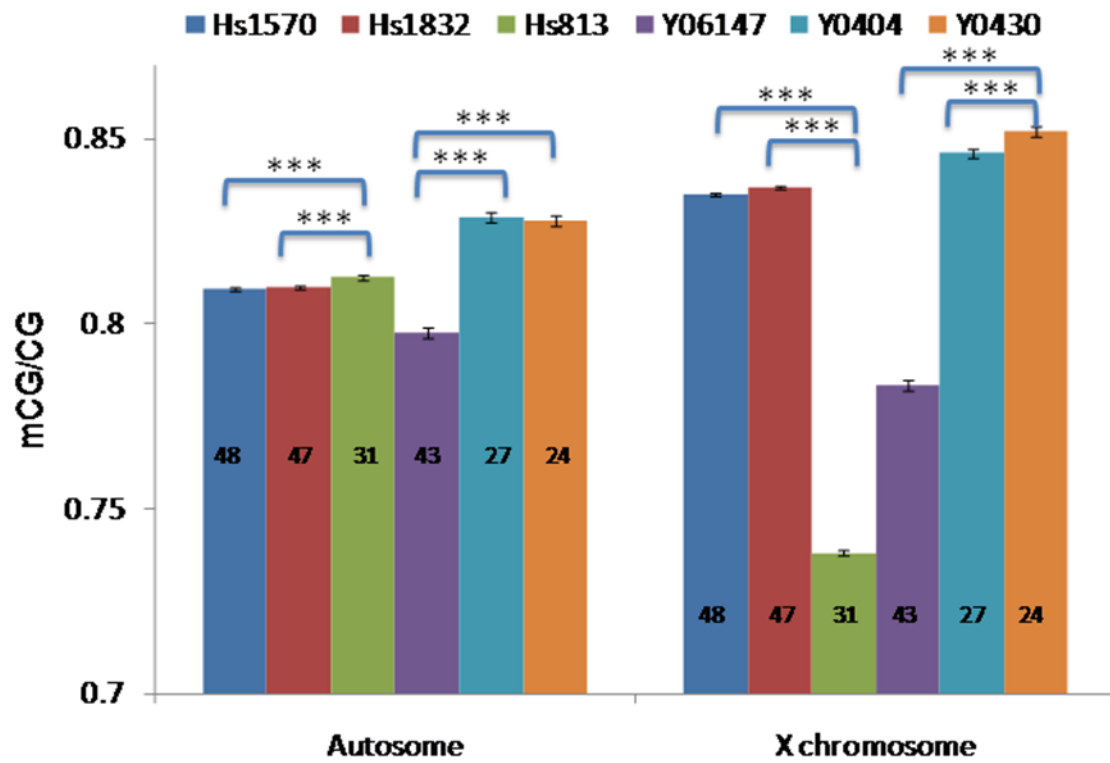

**Figure S7. DNA Methylation Level ( $\pm$  S.E.) in Autosomes and the X Chromosomes between Human and Chimpanzee Samples**

\*\*\*  $P < 10^{-15}$ , Wilcoxon test. The age of each individual are shown within each bar plot. The X chromosome is notably hypomethylated in the female individual (Hs813).

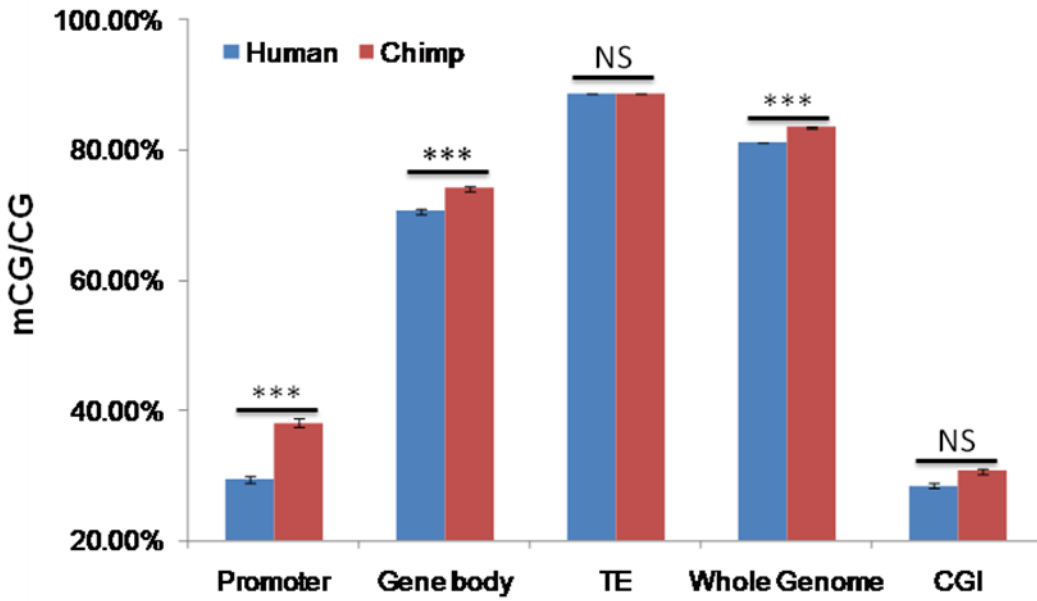

**Figure S8. Differences in Fractional Methylation Levels between Human and Chimpanzee Brains, When Only Autosomal Data Are Used**

The mean fractional methylation levels ( $\pm$  S.E.) of different genomic regions. \*\*\*  $P < 10^{-15}$ , NS: Not Significant.



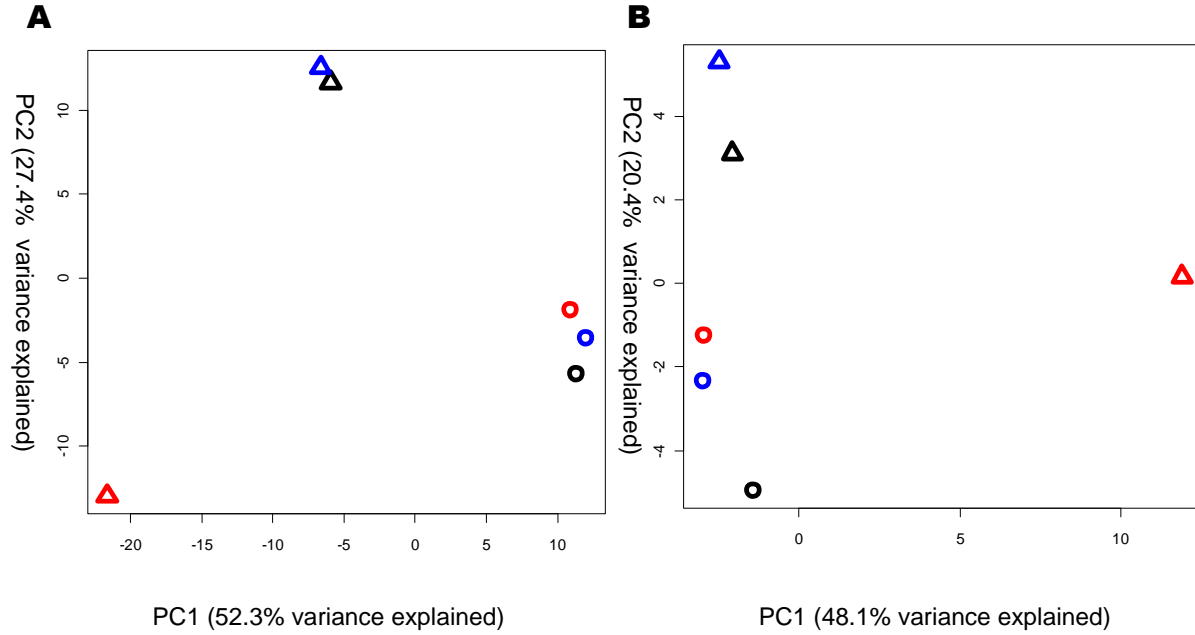

**Figure S9. Variation of Genomic DNA Methylation in the Human Brains (n = 3) and in the Chimpanzee Brains (n = 3), after Removing Orthologs in X Chromosome**

Principal component analysis of six methylation profiles, at both of the promoter (A) and gene body (B). PC1 and PC2, together with their explained variation, are plotted on the x-axis and y-axis, respectively. The first principal component, which explains 52.3% and 48.1% of variation in promoter and gene body respectively, separates two human samples from the third one. The second principal component, explaining 27.4% and 20.4% of total variation in promoter and gene body respectively, distinguishes samples from human and chimpanzees.

**Table S1. Descriptions of Six Individuals Used for Methylation Analyses**

| Species    | ID     | Age | Sex    | Cause of Death           | Numbers of Total Reads ( $\times 10^6$ ) |
|------------|--------|-----|--------|--------------------------|------------------------------------------|
| Human      | Hs1570 | 48  | Male   | Accident                 | 354.9                                    |
| Human      | Hs1832 | 47  | Male   | Cardiovascular disease   | 327.1                                    |
| Human      | Hs813  | 31  | Female | Accident                 | 343.1                                    |
| Chimpanzee | Y06147 | 43  | Male   | Congestive heart failure | 309.0                                    |
| Chimpanzee | Y0404  | 27  | Male   | Cardiac fibrosis         | 391.4                                    |
| Chimpanzee | Y0430  | 24  | Male   | Myocardial fibrosis      | 331.2                                    |

**Table S2. Human and Chimpanzee Samples Used for Expression Analyses**

| Sample                 | Age | Sex | PMI | RIN | Identifier | Cause of Death                       |
|------------------------|-----|-----|-----|-----|------------|--------------------------------------|
| <i>Homo sapiens</i>    |     |     |     |     |            |                                      |
| Hs_FP_1                | 31  | F   | 14  | 7.9 | 813        | Accident                             |
| Hs_FP_2                | 40  | M   | 7   | 7.2 | 1903       | Cardiovascular disease               |
| Hs_FP_3                | 30  | M   | 12  | 6.8 | 1029       | Accident                             |
| Hs_FP_4                | 20  | F   | 4   | 6.8 | 4548       | Injuries from motor vehicle accident |
| Hs_FP_5                | 45  | M   | 6   | 7.2 | 4598       | Dilated cardiomyopathy               |
| Hs_FP_6                | 42  | M   | 15  | 6.8 | 1134       | Cardiovascular disease               |
| <i>Pan troglodytes</i> |     |     |     |     |            |                                      |
| Pt_FP_1                | 18  | M   | 3   | 7.6 | Y07.147    | Cardiac fibrosis                     |
| Pt_FP_2                | 27  | M   | 0.5 | 5.1 | Y04.04     | Cardiac fibrosis                     |
| Pt_FP_3                | 43  | M   | 2.5 | 4.3 | Y06.147    | Myocardial fibrosis                  |
| Pt_FP_4                | 21  | M   | 13  | 4.5 | Y03.09     | Liver failure                        |
| Pt_FP_5                | 44  | F   | 0.5 | 3.1 | Y06.108    | Atherosclerosis                      |
| Pt_FP_6                | 28  | M   | 3   | 4.1 | Y05.12     | Cardiac fibrosis                     |

PMI=post mortem interval in hours; Age is in years

RIN=RNA integrity number

**Table S3. Comparison of CpG Methylation from Enard et al [8]**

| <b>Gene</b> | <b>Human Coordinate</b> | <b>Human mCG/CG (Total # of reads)</b> | <b>Chimp coordinate</b> | <b>Chimpanzee mCG/CG (Total # of Reads)</b> |
|-------------|-------------------------|----------------------------------------|-------------------------|---------------------------------------------|
| CTLA4_4     | chr2:204735456          | 100% (39)                              | chr2b:209400249         | 100% (10)                                   |
| UBC_2       | chr17:16284399          | 0% (100)                               | chr17random:2377926     | 0% (13)                                     |
| UBC_3       | chr17:16284414          | 0% (92)                                | chr17random:2378140     | 0% (9)                                      |
| EGFR_4      | chr2:73520852           | 0% (10)                                | chr2a:74879569          | 0% (4)                                      |
| MYCL1_2     | chr1:40367966           | 0% (30)                                | chr1:40541066           | 0% (5)                                      |
| LTA_1       | chr6:31540014           | 100% (8)                               | chr6:32134113           | 100% (12)                                   |
| GP1BB_2     | chr22:19710890          | 100% (27)                              | chr22:18179194          | 100% (13)                                   |
| GP1BB_3     | chr22:19710984          | 100% (7)                               | chr22:18179288          | 100% (7)                                    |
| CDC25A_1    | chr3:48229881           | 0% (5)                                 | chr3:49296979           | 0% (N/A)                                    |
| POMC_3      | chr2:25391523           | 0% (8)                                 | chr2a:25701886          | 0% (11)                                     |
| EGR4_4      | chr2:73520819           | 0% (14)                                | chr2a:74879569          | 0% (16)                                     |
| SLC25A4_1   | chr4:186064167          | 0% (2)                                 | chr4:189828250          | 0% (5)                                      |
| SLC25A4_3   | chr4:186064191          | 0% (5)                                 | chr4:189828276          | 0% (N/A)                                    |
| CD63_4      | chr12:56122912          | 0% (7)                                 | chr12:33919706          | 0% (N/A)                                    |

All the individual CpG site in the following table are reported to be significantly differentially methylated between human and chimpanzee according to Enard et al [8]. The mCG/CG values are calculated based on all the 3 individuals in human or chimpanzee from our data.

**Table S4. 468 Genes for which the Human Promoters Exhibit Hypomethylation compared to the Chimpanzee Promoters**

| Gene      | Human_FM | Chimp_FM | Gene      | Human_FM | Chimp_FM |
|-----------|----------|----------|-----------|----------|----------|
| NM_000561 | 0.123955 | 0.957179 | NM_153006 | 0.198726 | 0.9512   |
| NM_001408 | 0.147459 | 0.943429 | NM_173079 | 0.109816 | 0.947909 |
| NM_001688 | 0.055405 | 0.8015   | NM_174887 | 0.016233 | 0.864818 |
| NM_001779 | 0.108063 | 0.924409 | NM_176096 | 0.036585 | 0.861733 |
| NM_002506 | 0.181879 | 0.904218 | NM_176863 | 0.051545 | 0.804917 |
| NM_002524 | 0.164    | 0.9175   | NM_177550 | 0.148594 | 0.833333 |
| NM_002884 | 0.084507 | 0.804    | NM_178517 | 0.006975 | 0.957684 |
| NM_003051 | 0.012245 | 0.92519  | NM_183377 | 0.010371 | 0.905083 |
| NM_003594 | 0.045553 | 0.969963 | NM_001071 | 0.170956 | 0.914971 |
| NM_003846 | 0.140669 | 0.870231 | NM_001279 | 0.132136 | 0.835417 |
| NM_004978 | 0.08493  | 0.824231 | NM_002828 | 0.071892 | 0.957596 |
| NM_005399 | 0.073585 | 0.882952 | NM_002845 | 0.009803 | 0.9266   |
| NM_005725 | 0.064017 | 0.990786 | NM_003409 | 0.011448 | 0.888684 |
| NM_005872 | 0.158102 | 0.956091 | NM_003799 | 0.014978 | 0.997079 |
| NM_006090 | 0.021891 | 0.875    | NM_005433 | 0.048833 | 0.940355 |
| NM_006099 | 0.112411 | 0.830306 | NM_006101 | 0.016932 | 0.992071 |
| NM_006135 | 0.022423 | 0.895591 | NM_006471 | 0.095408 | 0.889545 |
| NM_006402 | 0.13143  | 0.93342  | NM_006796 | 0.016441 | 0.802074 |
| NM_006468 | 0.005824 | 0.886    | NM_014214 | 0.042101 | 0.864765 |
| NM_006492 | 0.144102 | 0.873344 | NM_020412 | 0.003628 | 0.927714 |
| NM_006608 | 0.097479 | 0.961556 | NM_020648 | 0.150178 | 0.944421 |
| NM_006699 | 0.005938 | 0.8148   | NM_023075 | 0.05123  | 0.962938 |
| NM_006784 | 0.029517 | 0.95625  | NM_024899 | 0        | 0.97     |
| NM_007204 | 0.077615 | 0.970727 | NM_031216 | 0.015949 | 0.953727 |
| NM_014455 | 0.05417  | 1        | NM_032048 | 0.11427  | 0.92232  |
| NM_015013 | 0.031145 | 1        | NM_130386 | 0.158992 | 0.93084  |
| NM_015836 | 0.169321 | 0.960526 | NM_145287 | 0.189    | 0.811833 |
| NM_015906 | 0.057453 | 1        | NM_152352 | 0.017051 | 0.973625 |
| NM_016361 | 0.15604  | 0.991308 | NM_153000 | 0.154793 | 0.955188 |
| NM_017686 | 0.001477 | 0.819586 | NM_170695 | 0.006333 | 0.898706 |
| NM_017709 | 0.08558  | 0.932353 | NM_173464 | 0.189265 | 0.886885 |
| NM_017744 | 0.00591  | 0.888889 | NM_002850 | 0.174781 | 0.826194 |
| NM_018704 | 0.103744 | 0.965909 | NM_014475 | 0.119737 | 1        |
| NM_022836 | 0.028069 | 0.859818 | NM_020951 | 0.013554 | 0.85     |
| NM_024102 | 0.068122 | 0.888933 | NM_021185 | 0.188991 | 0.853333 |
| NM_024494 | 0.086665 | 0.89308  | NM_032838 | 0.083889 | 0.872727 |

|           |          |          |  |           |          |          |
|-----------|----------|----------|--|-----------|----------|----------|
| NM_025073 | 0.192275 | 1        |  | NM_032885 | 0.045273 | 0.867667 |
| NM_025188 | 0.090398 | 0.992    |  | NM_133466 | 0.119688 | 0.971278 |
| NM_138959 | 0.155515 | 1        |  | NM_002381 | 0.139024 | 1        |
| NM_152696 | 0.05511  | 0.953651 |  | NM_017933 | 0.179681 | 0.838714 |
| NM_172212 | 0.109659 | 0.945538 |  | NM_025029 | 0.07486  | 0.874127 |
| NM_178454 | 0.012432 | 1        |  | NM_002969 | 0.129569 | 1        |
| NM_181643 | 0.057279 | 0.901125 |  | NM_000335 | 0.148852 | 0.997    |
| NM_005437 | 0.16426  | 0.892195 |  | NM_130384 | 0.08023  | 0.866667 |
| NM_033338 | 0.103467 | 0.939455 |  | NM_000222 | 0.093491 | 0.907971 |
| NM_001923 | 0.140068 | 0.818872 |  | NM_000232 | 0.10655  | 0.920389 |
| NM_003377 | 0.168358 | 1        |  | NM_000807 | 0.073957 | 0.922652 |
| NM_015533 | 0.004303 | 0.959259 |  | NM_000812 | 0.145    | 0.98268  |
| NM_017515 | 0.177496 | 0.977273 |  | NM_000938 | 0.018542 | 0.853667 |
| NM_000075 | 0.046628 | 0.905318 |  | NM_001511 | 0.17388  | 0.981579 |
| NM_000376 | 0.081042 | 0.859864 |  | NM_001553 | 0.028242 | 0.919107 |
| NM_000456 | 0.060129 | 0.979545 |  | NM_001812 | 0.016197 | 1        |
| NM_001659 | 0.186029 | 0.806    |  | NM_002089 | 0.170761 | 0.907611 |
| NM_001714 | 0.117212 | 0.97875  |  | NM_002253 | 0.02521  | 0.861    |
| NM_002135 | 0.117227 | 0.912033 |  | NM_002703 | 0.003588 | 1        |
| NM_002178 | 0.187515 | 0.83576  |  | NM_002993 | 0.115973 | 0.960586 |
| NM_002206 | 0.02778  | 0.868357 |  | NM_002994 | 0.094109 | 0.958045 |
| NM_002223 | 0.073809 | 0.976167 |  | NM_003215 | 0.128128 | 0.960731 |
| NM_002300 | 0.123619 | 0.97355  |  | NM_003943 | 0.105404 | 0.886455 |
| NM_002733 | 0.076185 | 0.944273 |  | NM_004354 | 0.030986 | 0.838935 |
| NM_002822 | 0.044908 | 0.949027 |  | NM_004439 | 0.019843 | 0.849045 |
| NM_002868 | 0.000283 | 0.823357 |  | NM_004464 | 0.020727 | 0.966667 |
| NM_002907 | 0.039953 | 0.895737 |  | NM_004885 | 0.094266 | 0.80148  |
| NM_003034 | 0.005516 | 0.974556 |  | NM_004898 | 0.021768 | 0.927704 |
| NM_003394 | 0.161438 | 0.855263 |  | NM_005506 | 0.040905 | 0.995304 |
| NM_003483 | 0.023468 | 0.986743 |  | NM_005612 | 0.169511 | 0.964439 |
| NM_003622 | 0.17756  | 0.970378 |  | NM_006206 | 0.087055 | 0.915225 |
| NM_003920 | 0.130366 | 0.956522 |  | NM_006452 | 0.036481 | 0.90075  |
| NM_004264 | 0.063833 | 0.943714 |  | NM_006665 | 0.11118  | 0.85425  |
| NM_004302 | 0.033241 | 0.944625 |  | NM_006681 | 0.05172  | 0.983333 |
| NM_004719 | 0.001233 | 0.9562   |  | NM_006835 | 0.172965 | 0.824357 |
| NM_004858 | 0.10884  | 0.888273 |  | NM_006947 | 0.097042 | 0.890467 |
| NM_005164 | 0.118373 | 0.899933 |  | NM_012110 | 0.010053 | 0.933353 |
| NM_005171 | 0.086736 | 0.9389   |  | NM_012297 | 0.064029 | 0.859381 |
| NM_005176 | 0.025229 | 0.857132 |  | NM_014243 | 0.160694 | 0.978737 |
| NM_005371 | 0.059494 | 1        |  | NM_014933 | 0.055868 | 0.974    |

|           |          |          |  |           |          |          |
|-----------|----------|----------|--|-----------|----------|----------|
| NM_005419 | 0.133356 | 0.945    |  | NM_014991 | 0.008014 | 1        |
| NM_005748 | 0.135917 | 0.872848 |  | NM_015115 | 0.026846 | 0.970222 |
| NM_005811 | 0.040935 | 0.9625   |  | NM_015436 | 0.070511 | 0.947867 |
| NM_005981 | 0.138795 | 0.923885 |  | NM_015697 | 0.088079 | 0.9295   |
| NM_006231 | 0.004118 | 0.806094 |  | NM_016067 | 0.106848 | 0.851615 |
| NM_006601 | 0.109889 | 0.970588 |  | NM_017426 | 0.039159 | 0.909619 |
| NM_006928 | 0.04707  | 0.928968 |  | NM_017845 | 0.109632 | 0.938611 |
| NM_006940 | 0.132476 | 0.968842 |  | NM_018227 | 0.071931 | 1        |
| NM_007211 | 0.007212 | 0.8917   |  | NM_018243 | 0.042377 | 0.970258 |
| NM_012117 | 0.000153 | 0.840679 |  | NM_018261 | 0.163636 | 1        |
| NM_013254 | 0.010564 | 0.855296 |  | NM_018475 | 0.16746  | 0.938816 |
| NM_013277 | 0.164617 | 0.912944 |  | NM_020236 | 0.077043 | 1        |
| NM_014182 | 0.011899 | 0.847    |  | NM_020368 | 0.159378 | 0.9935   |
| NM_014191 | 0.101948 | 0.986426 |  | NM_020453 | 0.135367 | 0.8901   |
| NM_014254 | 0.042683 | 0.994792 |  | NM_021114 | 0.180101 | 0.986842 |
| NM_014255 | 0.078259 | 0.942857 |  | NM_022832 | 0.064167 | 1        |
| NM_014319 | 0.112356 | 1        |  | NM_024592 | 0.055655 | 0.923083 |
| NM_014764 | 0.142341 | 0.901909 |  | NM_024672 | 0.003899 | 0.952    |
| NM_015000 | 0.145947 | 0.9213   |  | NM_024906 | 0.112508 | 0.805176 |
| NM_015292 | 0.0434   | 0.97885  |  | NM_032217 | 0.007878 | 0.982769 |
| NM_015416 | 0.186646 | 0.895125 |  | NM_032313 | 0.022058 | 0.984622 |
| NM_015633 | 0.008581 | 0.837517 |  | NM_058172 | 0.102533 | 1        |
| NM_015989 | 0.084763 | 1        |  | NM_133636 | 0.039678 | 0.9886   |
| NM_016072 | 0.032667 | 0.8981   |  | NM_139076 | 0.097221 | 0.863231 |
| NM_016123 | 0.117487 | 0.988143 |  | NM_139211 | 0.1775   | 0.804828 |
| NM_016551 | 0.020333 | 0.895    |  | NM_144721 | 0.111194 | 0.889731 |
| NM_017822 | 0.103625 | 0.857226 |  | NM_145263 | 0.140314 | 0.883714 |
| NM_018164 | 0.008744 | 0.842172 |  | NM_152540 | 0.191282 | 0.92025  |
| NM_018448 | 0.008755 | 0.874583 |  | NM_152545 | 0.064331 | 0.833222 |
| NM_018663 | 0.119717 | 1        |  | NM_152770 | 0.101974 | 0.949375 |
| NM_020142 | 0.078014 | 0.860361 |  | NM_152995 | 0.079381 | 0.964286 |
| NM_020183 | 0.046078 | 0.930484 |  | NM_173468 | 0.144658 | 0.966429 |
| NM_021238 | 0.159419 | 0.89335  |  | NM_173536 | 0.105119 | 0.916625 |
| NM_023071 | 0.083188 | 0.873727 |  | NM_173827 | 0.111063 | 0.857415 |
| NM_023925 | 0.029956 | 0.882769 |  | NM_175619 | 0.198393 | 0.883732 |
| NM_024604 | 0.015757 | 0.836625 |  | NM_181806 | 0.034027 | 0.886865 |
| NM_024902 | 0.053715 | 0.943783 |  | NM_000082 | 0.018714 | 0.874385 |
| NM_031292 | 0.184007 | 0.841222 |  | NM_000163 | 0.046298 | 0.9028   |
| NM_032256 | 0.084987 | 0.8055   |  | NM_000436 | 0.15741  | 0.859115 |
| NM_032338 | 0.013688 | 0.918882 |  | NM_000439 | 0.037556 | 0.921313 |

|           |          |          |  |           |          |          |
|-----------|----------|----------|--|-----------|----------|----------|
| NM_032364 | 0.008156 | 0.911133 |  | NM_000514 | 0.066938 | 0.962774 |
| NM_032786 | 0.021782 | 0.949087 |  | NM_000791 | 0.152393 | 0.852462 |
| NM_032889 | 0.103467 | 0.91716  |  | NM_000908 | 0.01234  | 0.871311 |
| NM_032901 | 0.094147 | 0.910533 |  | NM_000958 | 0.057274 | 0.926231 |
| NM_033082 | 0.053161 | 0.9428   |  | NM_000997 | 0.146067 | 0.876723 |
| NM_033114 | 0.044189 | 0.947067 |  | NM_001025 | 0.045707 | 0.813173 |
| NM_033276 | 0.052516 | 0.90769  |  | NM_001207 | 0.05775  | 0.914053 |
| NM_033647 | 0.016067 | 0.913043 |  | NM_001343 | 0.038476 | 0.933345 |
| NM_052885 | 0.116079 | 0.969864 |  | NM_001867 | 0.157391 | 0.913364 |
| NM_134323 | 0.00466  | 0.870182 |  | NM_001884 | 0.151369 | 0.917857 |
| NM_138473 | 0.090539 | 0.914457 |  | NM_001992 | 0.109426 | 0.912875 |
| NM_144576 | 0.182468 | 0.873    |  | NM_002184 | 0.043676 | 0.866615 |
| NM_144593 | 0.054578 | 0.907419 |  | NM_002495 | 0.057377 | 0.930667 |
| NM_152320 | 0.10504  | 0.912609 |  | NM_002853 | 0.046168 | 0.90668  |
| NM_152440 | 0.166566 | 0.91839  |  | NM_003187 | 0.035146 | 0.8799   |
| NM_153026 | 0.0085   | 0.933886 |  | NM_003664 | 0.026463 | 0.857167 |
| NM_153377 | 0.062629 | 0.906391 |  | NM_003719 | 0.04709  | 0.939417 |
| NM_153633 | 0.01037  | 0.831133 |  | NM_004272 | 0.014731 | 0.946    |
| NM_153634 | 0.018906 | 0.983762 |  | NM_004291 | 0.080574 | 0.8746   |
| NM_173802 | 0.14663  | 0.9465   |  | NM_004465 | 0.032061 | 0.853065 |
| NM_178169 | 0.048341 | 1        |  | NM_004520 | 0.135278 | 0.878833 |
| NM_181711 | 0.07323  | 0.898339 |  | NM_004607 | 0.140526 | 1        |
| NM_181847 | 0.061758 | 0.9653   |  | NM_004932 | 0.185765 | 0.85695  |
| NM_015070 | 0.089661 | 0.959125 |  | NM_004934 | 0.156075 | 0.860231 |
| NM_006370 | 0.188061 | 0.973208 |  | NM_005711 | 0.04937  | 0.853818 |
| NM_001176 | 0.12238  | 0.85     |  | NM_005713 | 0.076229 | 0.909091 |
| NM_145059 | 0.175763 | 0.89219  |  | NM_005779 | 0.182225 | 0.876    |
| NM_173803 | 0.080336 | 0.847368 |  | NM_005869 | 0.04111  | 0.930125 |
| NM_173806 | 0.15776  | 0.858857 |  | NM_006251 | 0.000587 | 0.990476 |
| NM_000286 | 0.069384 | 0.889455 |  | NM_006451 | 0.179455 | 0.958789 |
| NM_000382 | 0.016112 | 0.930542 |  | NM_006633 | 0.084513 | 0.959029 |
| NM_000386 | 0.172425 | 0.948692 |  | NM_012081 | 0.109412 | 0.869375 |
| NM_000988 | 0.110247 | 0.928938 |  | NM_012176 | 0.098    | 0.981318 |
| NM_001045 | 0.134184 | 0.878595 |  | NM_013235 | 0.017955 | 0.967667 |
| NM_001070 | 0.025835 | 0.911231 |  | NM_013409 | 0.000841 | 0.831533 |
| NM_001304 | 0.092385 | 0.859111 |  | NM_014473 | 0.122413 | 0.94605  |
| NM_001372 | 0.17918  | 0.980256 |  | NM_014639 | 0.00388  | 0.980422 |
| NM_001932 | 0.037488 | 0.94964  |  | NM_014899 | 0.047744 | 0.875    |
| NM_002230 | 0.140475 | 0.955603 |  | NM_015084 | 0.137419 | 0.961167 |
| NM_002795 | 0.000995 | 0.942857 |  | NM_015342 | 0.015409 | 0.827526 |

|           |          |          |  |           |          |          |
|-----------|----------|----------|--|-----------|----------|----------|
| NM_002809 | 0.040726 | 0.853471 |  | NM_015360 | 0.011647 | 0.842435 |
| NM_002878 | 0.194514 | 0.965909 |  | NM_015577 | 0.028704 | 0.905556 |
| NM_003010 | 0.079139 | 0.989474 |  | NM_016218 | 0.004123 | 0.969467 |
| NM_003079 | 0.02572  | 0.929421 |  | NM_018046 | 0.045559 | 0.953867 |
| NM_003110 | 0.065424 | 0.86625  |  | NM_018268 | 0.054992 | 0.924625 |
| NM_003204 | 0.055766 | 0.816125 |  | NM_018356 | 0.036216 | 0.982622 |
| NM_003559 | 0.185315 | 0.839429 |  | NM_018695 | 0.005916 | 0.9778   |
| NM_003876 | 0.074045 | 0.945782 |  | NM_019072 | 0.006    | 0.912607 |
| NM_004090 | 0.080792 | 0.86752  |  | NM_020801 | 0.025866 | 0.9205   |
| NM_004169 | 0.187321 | 0.871578 |  | NM_022483 | 0.031324 | 0.934211 |
| NM_004207 | 0.180306 | 1        |  | NM_022913 | 0.006788 | 0.960938 |
| NM_004217 | 0.161564 | 0.887167 |  | NM_023039 | 0.030816 | 0.87     |
| NM_004247 | 0.05772  | 0.900857 |  | NM_024615 | 0.076856 | 0.997345 |
| NM_004583 | 0.1604   | 0.864016 |  | NM_024717 | 0.009706 | 0.916727 |
| NM_004589 | 0.037792 | 0.81075  |  | NM_024754 | 0.120074 | 0.917647 |
| NM_004618 | 0.079222 | 0.937231 |  | NM_024941 | 0.011495 | 0.987167 |
| NM_004773 | 0.097299 | 0.83961  |  | NM_031482 | 0.139576 | 0.8478   |
| NM_004853 | 0.0036   | 0.954167 |  | NM_032042 | 0.0848   | 0.952    |
| NM_004871 | 0.099439 | 0.881778 |  | NM_032175 | 0.032891 | 0.948778 |
| NM_005148 | 0.173659 | 0.908111 |  | NM_032280 | 0.184917 | 0.914068 |
| NM_005175 | 0.165779 | 0.953    |  | NM_032290 | 0.023779 | 0.854125 |
| NM_005374 | 0.186759 | 0.976258 |  | NM_032380 | 0.047214 | 0.939235 |
| NM_005702 | 0.178302 | 0.94812  |  | NM_130767 | 0.065186 | 0.918    |
| NM_005854 | 0.119142 | 0.859343 |  | NM_133433 | 0.000291 | 0.9515   |
| NM_006041 | 0.03439  | 0.984621 |  | NM_138453 | 0.009503 | 0.803862 |
| NM_006042 | 0.148238 | 0.915105 |  | NM_139168 | 0.031267 | 0.973154 |
| NM_006546 | 0.029727 | 0.8778   |  | NM_144722 | 0.094303 | 0.890667 |
| NM_006804 | 0.115839 | 0.854607 |  | NM_144725 | 0.048901 | 0.959591 |
| NM_006807 | 0.072386 | 0.901655 |  | NM_152295 | 0.074692 | 0.888579 |
| NM_007026 | 0.008711 | 0.853182 |  | NM_152403 | 0.097297 | 0.846462 |
| NM_007144 | 0.001244 | 0.871643 |  | NM_152405 | 0.108927 | 0.920583 |
| NM_012138 | 0.027601 | 0.859656 |  | NM_152623 | 0.037028 | 0.971059 |
| NM_012393 | 0.001392 | 0.979931 |  | NM_152756 | 0.00122  | 0.985143 |
| NM_012448 | 0.08378  | 0.854848 |  | NM_153013 | 0.18621  | 0.967706 |
| NM_012481 | 0.137014 | 1        |  | NM_153188 | 0.072859 | 0.981958 |
| NM_013323 | 0.135904 | 0.816906 |  | NM_153354 | 0.078775 | 0.979563 |
| NM_013351 | 0.105398 | 0.8666   |  | NM_153361 | 0.039812 | 0.840778 |
| NM_013975 | 0.082441 | 0.820389 |  | NM_153485 | 0.050609 | 0.946429 |
| NM_014726 | 0.07402  | 0.880607 |  | NM_153706 | 0.185859 | 0.924056 |
| NM_014859 | 0.175659 | 0.827745 |  | NM_173514 | 0.162709 | 0.973913 |



|           |          |          |  |           |          |          |
|-----------|----------|----------|--|-----------|----------|----------|
| NM_014897 | 0.142989 | 0.901565 |  | NM_173665 | 0.12236  | 0.900727 |
| NM_015510 | 0.069035 | 0.951613 |  | NM_173829 | 0.004364 | 0.97725  |
| NM_016016 | 0.092926 | 0.848429 |  | NM_175921 | 0.063443 | 0.822917 |
| NM_016231 | 0        | 0.9332   |  | NM_176806 | 0.19797  | 0.829176 |
| NM_017758 | 0.091213 | 0.913043 |  | NM_176895 | 0.054473 | 0.988457 |
| NM_018307 | 0.071197 | 0.971444 |  | NM_178532 | 0.029702 | 0.841917 |
| NM_018405 | 0.176672 | 0.8412   |  | NM_181501 | 0.052351 | 0.961125 |
| NM_018428 | 0.140867 | 0.956522 |  | NM_182977 | 0.036466 | 0.84375  |
| NM_020233 | 0.140851 | 0.95     |  | NM_025218 | 0.117648 | 0.890667 |
| NM_020405 | 0.052398 | 0.93325  |  | NM_000168 | 0.050983 | 0.899767 |
| NM_020772 | 0.036364 | 0.941424 |  | NM_000712 | 0.094477 | 0.904605 |
| NM_020889 | 0.044762 | 0.813685 |  | NM_002787 | 0.004198 | 0.940333 |
| NM_021628 | 0.006292 | 0.8451   |  | NM_002835 | 0.092743 | 1        |
| NM_021939 | 0.02031  | 0.856433 |  | NM_004760 | 0.084421 | 0.868333 |
| NM_024683 | 0.182243 | 0.96332  |  | NM_012479 | 0.095199 | 0.809457 |
| NM_024864 | 0.07438  | 0.833939 |  | NM_015052 | 0.05623  | 0.814897 |
| NM_025267 | 0.030928 | 0.975529 |  | NM_015641 | 0.142683 | 0.852952 |
| NM_031934 | 0.18301  | 0.869102 |  | NM_015983 | 0.130885 | 0.85228  |
| NM_032141 | 0.137042 | 0.968667 |  | NM_017920 | 0.073394 | 0.934532 |
| NM_032322 | 0.149417 | 0.928607 |  | NM_018224 | 0.095339 | 0.86087  |
| NM_032875 | 0.029765 | 0.873    |  | NM_024054 | 0.070289 | 0.941176 |
| NM_033133 | 0.084745 | 0.924588 |  | NM_024653 | 0.168882 | 0.98     |
| NM_052857 | 0.034803 | 0.874737 |  | NM_024963 | 0.11953  | 0.916688 |
| NM_133439 | 0.083907 | 0.985026 |  | NM_032014 | 0.141765 | 0.975408 |
| NM_138355 | 0.140196 | 0.823429 |  | NM_053043 | 0.115661 | 0.847897 |
| NM_138463 | 0.011524 | 0.803    |  | NM_138701 | 0.176534 | 0.907231 |
| NM_139034 | 0.008599 | 0.923077 |  | NM_173678 | 0        | 0.938773 |
| NM_139280 | 0.121105 | 0.868237 |  | NM_138462 | 0.173671 | 1        |
| NM_144775 | 0.014529 | 0.897321 |  | NM_000033 | 0.053766 | 1        |
| NM_144997 | 0.059693 | 0.863    |  | NM_000202 | 0.119048 | 0.802778 |
| NM_145654 | 0.136016 | 1        |  | NM_001167 | 0.019231 | 0.888933 |
| NM_145663 | 0.141108 | 0.929306 |  | NM_005229 | 0.106383 | 0.875    |
| NM_145691 | 0.010506 | 0.923339 |  | NM_013444 | 0.071429 | 1        |
| NM_148172 | 0.032956 | 0.912986 |  | NM_024082 | 0.172681 | 1        |
| NM_152270 | 0.03294  | 0.919281 |  | NM_178124 | 0.090852 | 0.868579 |
| NM_152343 | 0.177046 | 0.881824 |  | NM_003140 | 0.057951 | 0.80341  |
| NM_152347 | 0.063795 | 0.890897 |  | NM_003411 | 0.016023 | 1        |
| NM_152464 | 0.001461 | 0.922435 |  | NM_004681 | 0.03587  | 0.9815   |

Human\_FM and Chimp\_FM refer to the fractional methylation levels in the human and chimpanzees, respectively.

**Table S5. Six Genes for which the Human Promoters Exhibit Hypermethylation Compared to the Chimpanzee Promoters**

| Gene      | Human_FM | Chimp_FM |
|-----------|----------|----------|
| NM_000413 | 0.9023   | 0.1951   |
| NM_001638 | 0.9813   | 0.0090   |
| NM_001872 | 0.9259   | 0.0137   |
| NM_003493 | 0.9848   | 0.1450   |
| NM_005435 | 1        | 0.1334   |
| NM_145064 | 0.8191   | 0.0350   |

**Table S6. Genes Whose Promoters Are Differentially Methylated between the Human and Chimpanzee Brains Using the Second Criterion (n = 1055) Are Enriched in Similar Gene Ontology (GO) Terms as the First Set**

| GO Terms                                 | Accession  | p Value (FDR) |
|------------------------------------------|------------|---------------|
| cellular process                         | GO:0009987 | 7.4e-12       |
| protein binding                          | GO:0005515 | 1.7e-09       |
| cellular macromolecule metabolic process | GO:0044260 | 2.1e-07       |
| cellular metabolic process               | GO:0044237 | 3.3e-07       |
| catalytic activity                       | GO:0003824 | 1.5e-06       |

**Table S7. Genes Whose Promoters Are Differentially Methylated between the Human and Chimpanzee Brains Using the Second Criterion (n = 1,055) Are Also Associated with Neurological Diseases, Psychological Disorders, and Cancers.**

| <b>Category</b>                          | <b>Count</b> | <b>Fold Enrichment</b> | <b>Genes</b>                                                                                                                                                                                                                                                                                                                                                                                                |
|------------------------------------------|--------------|------------------------|-------------------------------------------------------------------------------------------------------------------------------------------------------------------------------------------------------------------------------------------------------------------------------------------------------------------------------------------------------------------------------------------------------------|
| cocaine abuse                            | 3            | 6.2                    | NM_001045, NM_004898, NM_002616                                                                                                                                                                                                                                                                                                                                                                             |
| attention deficit hyperactivity disorder | 6            | 2.4                    | NM_000514, NM_001045, NM_002506, NM_015722, NM_002686, NM_000744                                                                                                                                                                                                                                                                                                                                            |
| autism                                   | 9            | 2.3                    | NM_019859, NM_000807, NM_001094, NM_000561, NM_001045, NM_000267, NM_183377, NM_004898, NM_173536, NM_002616                                                                                                                                                                                                                                                                                                |
| Chemodependency                          | 18           | 1.7                    | NM_000807, NM_019859, NM_000335, NM_005432, NM_004898, NM_000812, NM_173536, NM_002390, NM_002616, NM_001045, NM_000561, NM_006105, NM_000690, NM_005957, NM_004272, NM_000849, NM_004291, NM_000744                                                                                                                                                                                                        |
| cancer                                   | 56           | 1.2                    | NM_002634, NM_000267, NM_000222, NM_002907, NM_000791, NM_002253, NM_002878, NM_000075, NM_172212, NM_003250, NM_005957, NM_000849, NM_033360, NM_030762, NM_004725, NM_000179, NM_007211, NM_001071, NM_005086, NM_000376, NM_000561, NM_006160, NM_001067, NM_002011, NM_016123, NM_006665, NM_005432, NM_032991, NM_015641, NM_005235, NM_018127, NM_004083, NM_012481, NM_004456, NM_004985, NM_004324, |

|  |  |  |                                                                                                                                                                                                                                                                     |
|--|--|--|---------------------------------------------------------------------------------------------------------------------------------------------------------------------------------------------------------------------------------------------------------------------|
|  |  |  | NM_013975, NM_002474,<br>NM_002994, NM_000456,<br>NM_001239, NM_002524,<br>NM_006206, NM_006003,<br>NM_000163, NM_004448,<br>NM_000938, NM_030665,<br>NM_002686, NM_022406,<br>NM_001045, NM_004169,<br>NM_000690, NM_006804,<br>NM_001553, NM_016218,<br>NM_024757 |
|--|--|--|---------------------------------------------------------------------------------------------------------------------------------------------------------------------------------------------------------------------------------------------------------------------|
